# Supplementary material for: Healthcare trajectories before and after critical illness: population-based insight on diverse patients clusters
Source: Springer Nature journal article supplement (doi:10.1186/s13613-019-0599-3), 2019-11-09
Supplement: MOESM4 [file 17370540]

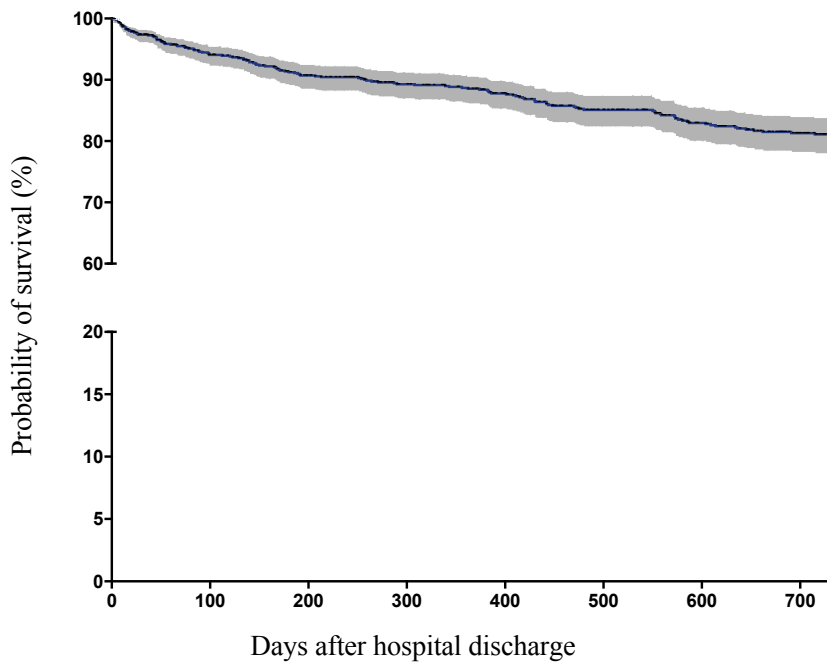

**Additional File 4: Figure 1** – Kaplan-Meier curve of cumulative survival rate during the two-years after intensive care unit admission, starting at hospital discharge. Gray area : confidence interval at 95%
